# Supplementary material for: Asserting a Functional Neurological Symptom Disorder with a Complementary Diagnostic Approach: A Brief Report
Source: MDPI journal article supplement (doi:10.3390/children10101601), 2023-09-25
Supplement: s1 [file s1]

**Supplementary Table S1: Clinical, biological and radiological assessments.** There were no anomalies in the tests carried out.

|                                      | Explorations performed                                                                                                                                  |
|--------------------------------------|---------------------------------------------------------------------------------------------------------------------------------------------------------|
| <b>Blood</b>                         | Hemogram, ionogram, inflammatory markers                                                                                                                |
|                                      | Viral PCR and RT-PCR for enterovirus, influenza virus, measles virus, mumps virus, Epstein-Barr Virus, cytomegalovirus, human herpes virus 6 and 8, HIV |
|                                      | Beta-D-glucan                                                                                                                                           |
|                                      | Interferon activity and Simoa digital ELISA.                                                                                                            |
|                                      | Chromatography of blood organic amino acids, search for enzymatic deficiency, pyruvate / lactate cycle, glycosaminoglycans, acylcarnitine               |
|                                      | Anti-nuclear antibody, anti-DNA, Anti Aquaporin 4 and MOG                                                                                               |
| <b>CSF</b>                           | Toxic cause (copper, lead, vitamin, exogenous)                                                                                                          |
|                                      | Lymphocyte immunophenotyping and complement dosage                                                                                                      |
|                                      | Proteinorachia, glycorachia, leucocyte and cell count. Bacterial and fungal culture                                                                     |
|                                      | Viral PCR and RT-PCR for enterovirus, cytomegalovirus, human herpes simplex virus 1 and 2                                                               |
| <b>Urine</b>                         | Interferon activity and Simoa digital ELISA.                                                                                                            |
|                                      | Autoimmune encephalitis antibody panel including MOG, Aquaporin 4, CASPR2, anti NMDAr and GAD                                                           |
| <b>Electroencephalograms</b>         | Chromatography of urinary organic amino acids                                                                                                           |
| <b>Radiological survey</b>           | 4 were recorded including during sleep and long duration with video recording but no seizures or abnormalities of the tracing were recorded.            |
| <b>Ophtalmological work-up</b>       | Brain CT scanner, Brain and spinal cord MRI                                                                                                             |
| <b>Otorhinolaryngologist work-up</b> | visual acuity, pupils, side vision, visual field, eye movement, eye pressure, retina and fundus                                                         |
|                                      | nasofibroscopy, auditory tests                                                                                                                          |
